# Supplementary material for: Ensembles of Spiking Neurons with Noise Support Optimal Probabilistic Inference in a Dynamically Changing Environment
Source: PubMed Central journal article supplement (PMC4207607; doi:10.1371/journal.pcbi.1003859), 2014-10-23
Supplement: pcbi.1003859.s003.pdf [file pcbi.1003859.s003.pdf]

# Supporting Text S2 for: Ensembles of spiking neurons with noise support optimal probabilistic inference in a dynamically changing environment

Robert Legenstein\*, Wolfgang Maass,  
**Institute for Theoretical Computer Science**  
**Graz University of Technology**  
**A-8010 Graz, Austria**  
 \* **E-mail:** robert.legenstein@igi.tugraz.at

## Cue combination in ENS coding

Cue combination, as considered for example in [1], is a nonlinear operation in ENS coding. In cue combination, evidence about a random variable  $v(t)$  is given in terms of the activity of two ensembles of neurons  $x_i^m$  and  $y_j^n$  coding two distributions  $Q^X(v(t))$  and  $Q^Y(v(t))$ . The activities of these two ensembles may result for example from the visual and auditory modality respectively. The task is to combine this evidence in a posterior distribution  $P(v(t))$  represented by a third ensemble  $z_k^l$ . If the activities in  $x_i^m$  and  $y_j^n$  are independent given the stimulus, then it is optimal to combine the distributions multiplicatively such that the desired posterior is given by  $P(v(t) = i) \propto Q^X(v(t) = i)Q^Y(v(t) = i)$ . If  $x_i^m$  and  $y_j^n$  represent the distributions through ENS coding, then a circuit with membrane potentials

$$u_i^m(t) = \frac{1}{L} \sum_n y_i^n(t) - I^{\text{dis}}(x_i^m(t)) - I^{\text{lat}}(t) \quad (1)$$

combines the cues and  $z_k^l$  represents the approximate posterior in ENS coding. Again, the multiplication is approximated by disinhibition.

## References

1. Ma WJ, Beck JM, Latham PE, Pouget A (2006) Bayesian inference with probabilistic population codes. *Nat Neurosci* 9: 1432–1438.
